# Supplementary material
Source: Springer Nature journal article supplement (https://www.springermedizin.de/resource/supplementary/12891_2009_814_MOESM3_ESM.pdf/9507080)
Supplement: MOESM3 [file 9507080]

January 2006

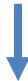

**BMD1**

**BMD2**

**BMD 3**

Change in spine BMD: -0.0066

Change in spine BMD: -0.0321\*\*

Change in femur BMD: 0.0011

Change in femur BMD: -0.0205\*
